# Supplementary material for: Prediction of Eutrophic Water Quality in the Daluxi River Based on a Multi-Scale Feature Extraction and Hybrid Screening Strategy
Source: Research Square preprint supplement (doi:10.21203/rs.3.rs-6662259/v1), 2025-06-26
Supplement: Supplementary file 1 [file 55cf52159668230dfacb5991.docx]

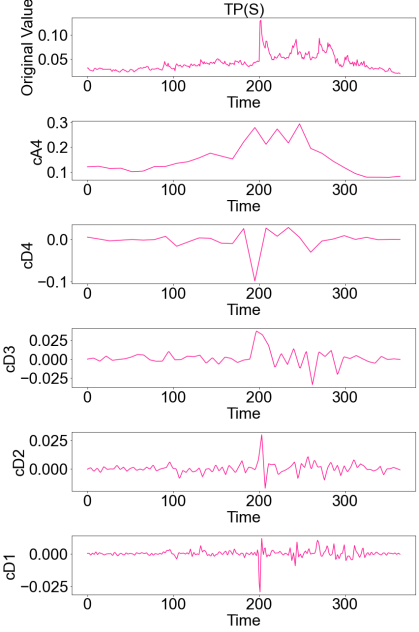

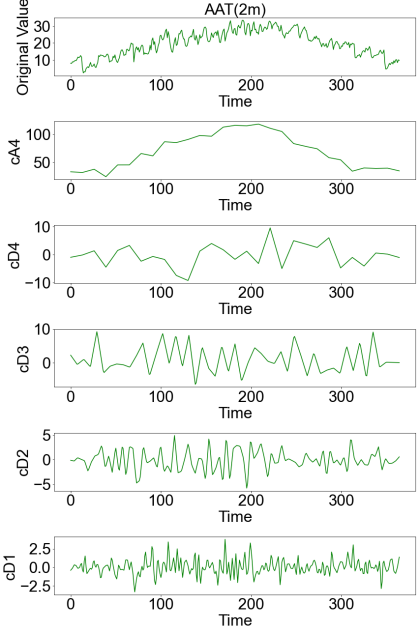

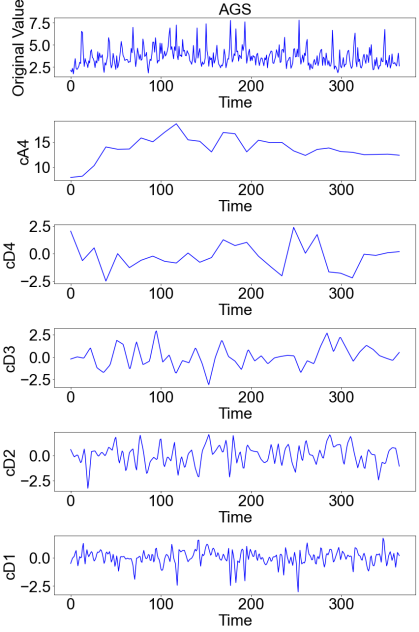

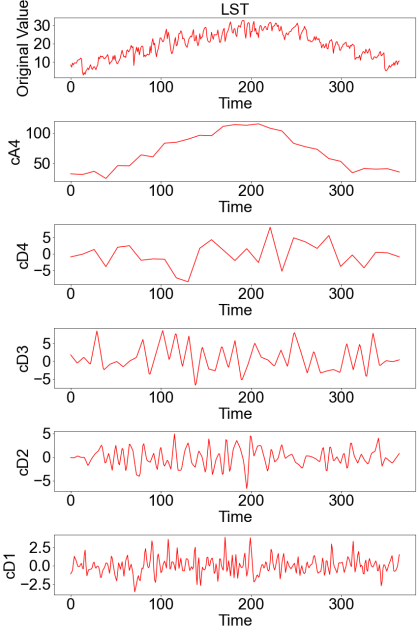

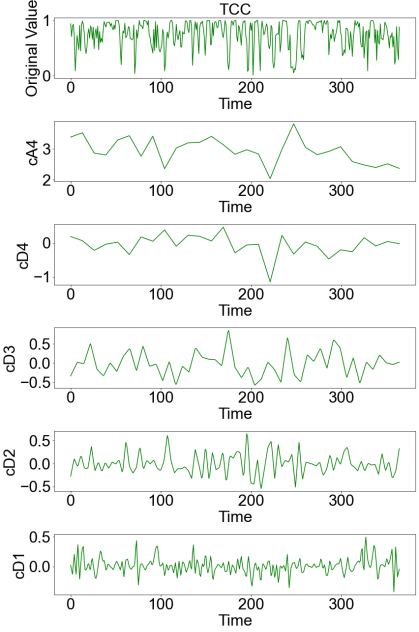

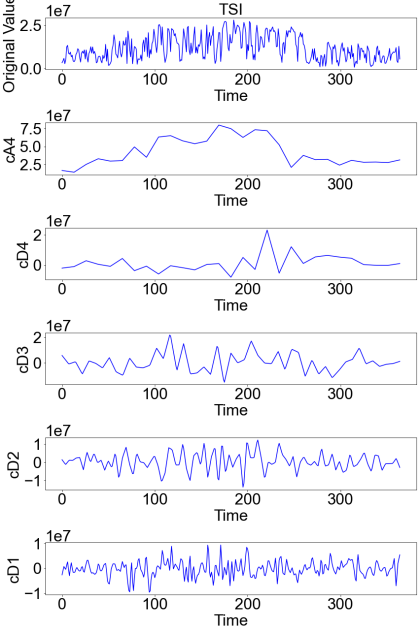

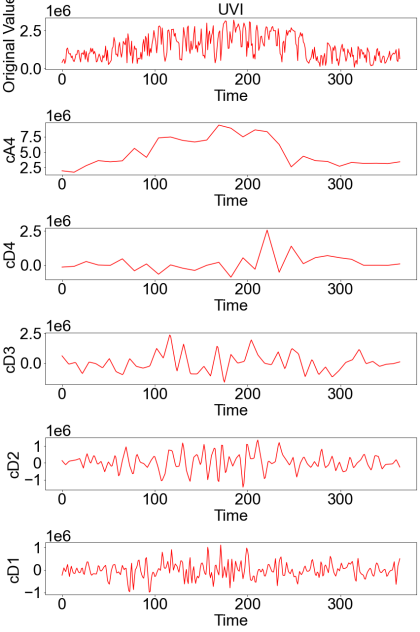


**Fig.S1** Wavelet component plot of TP(S), AAT(2m), AGS, LST, TCC, TSI, UVI


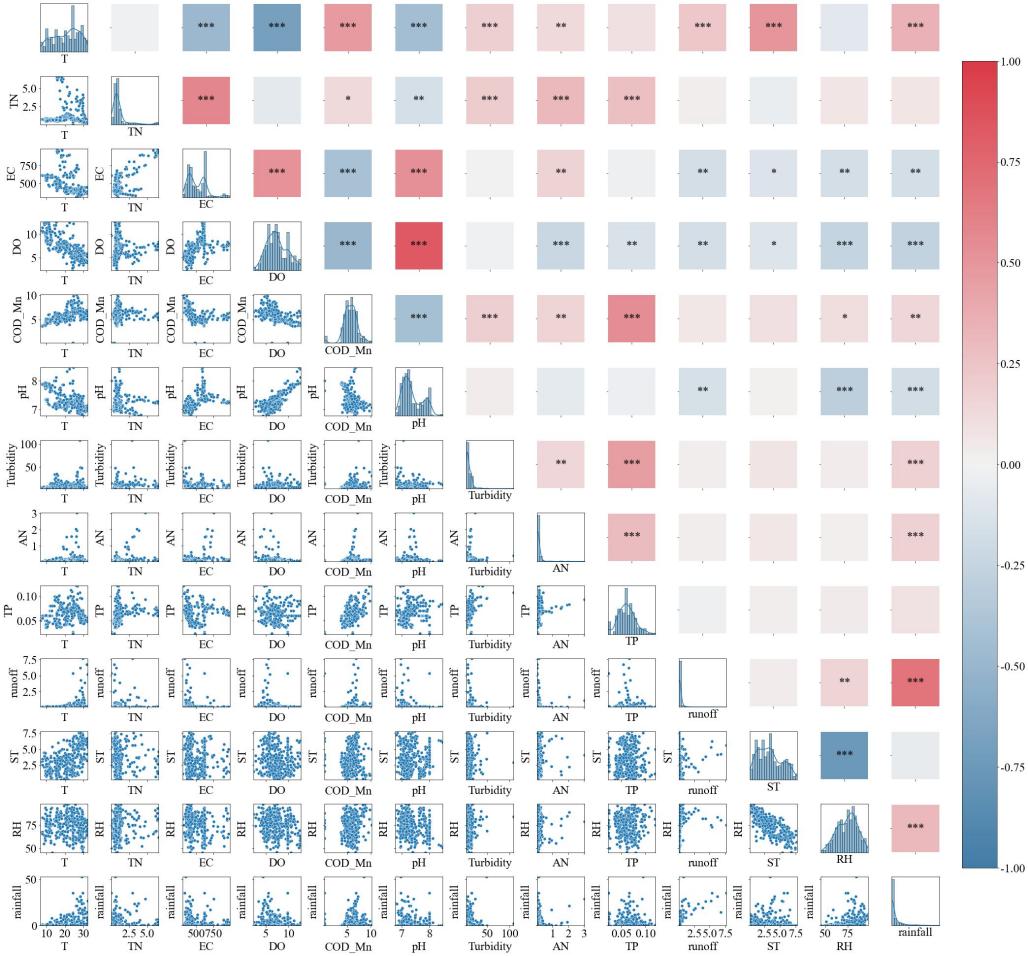


**Fig.S2** Pearson correlation results for the raw data of Wandang


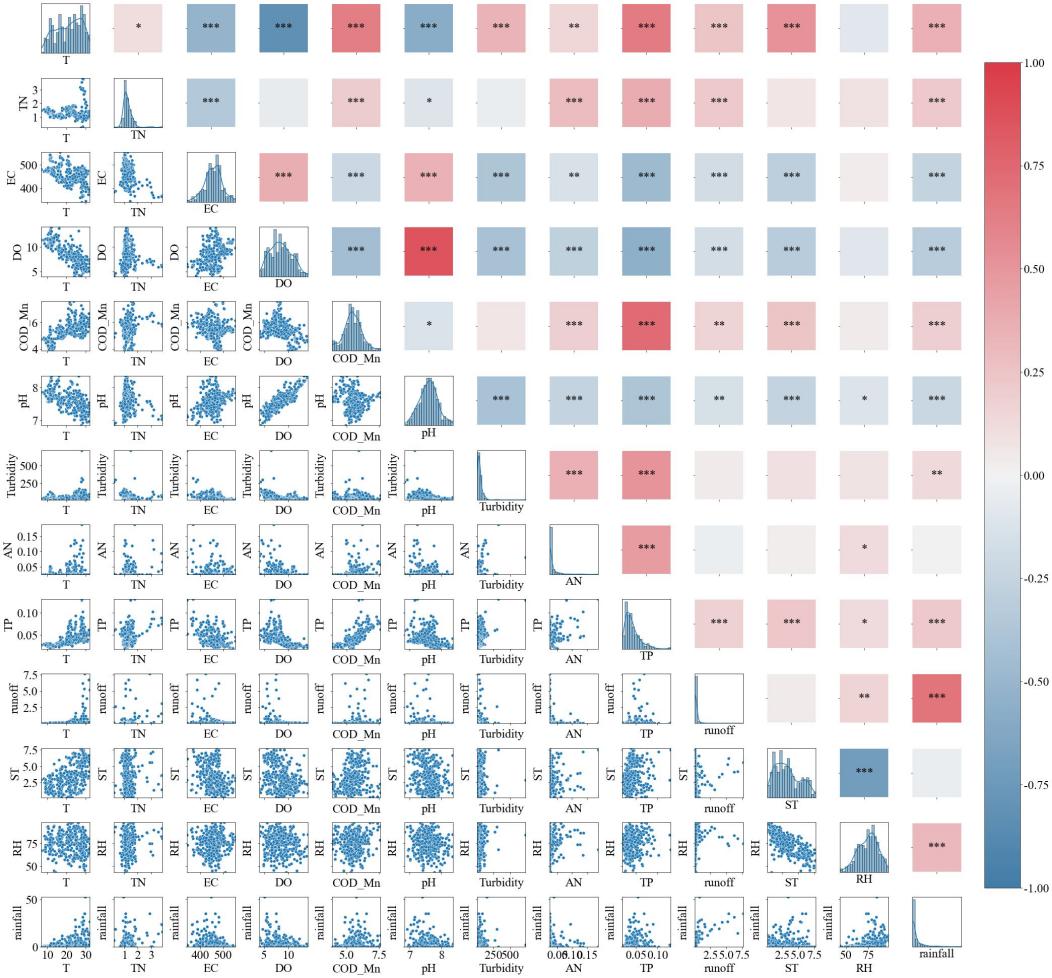


**Fig.S3** Pearson correlation results for the raw data of Siming


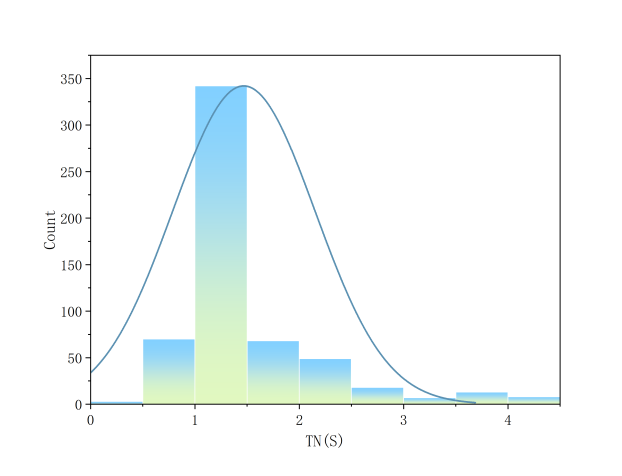

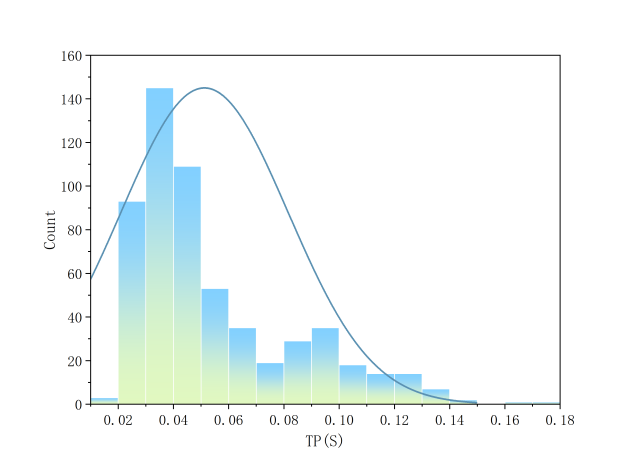

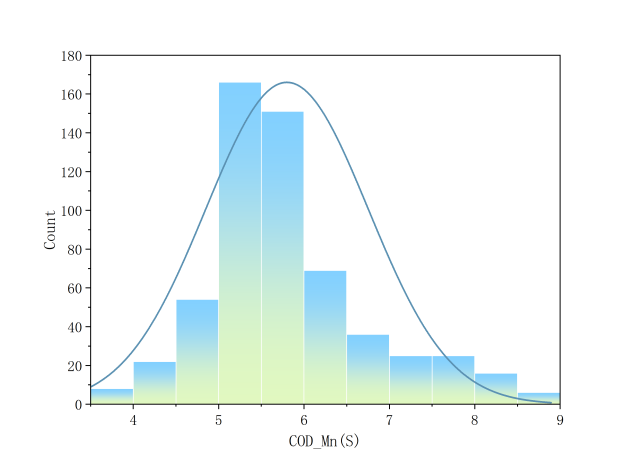

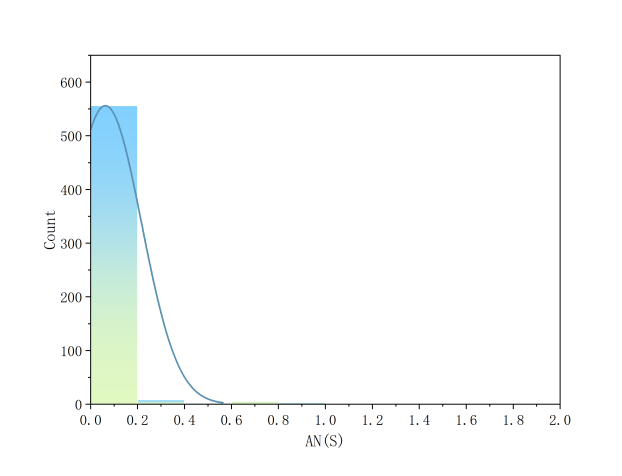


**Fig.S4** Frequency histogram of TN(S)、TP(S)、CODMn(S)、AN(S)


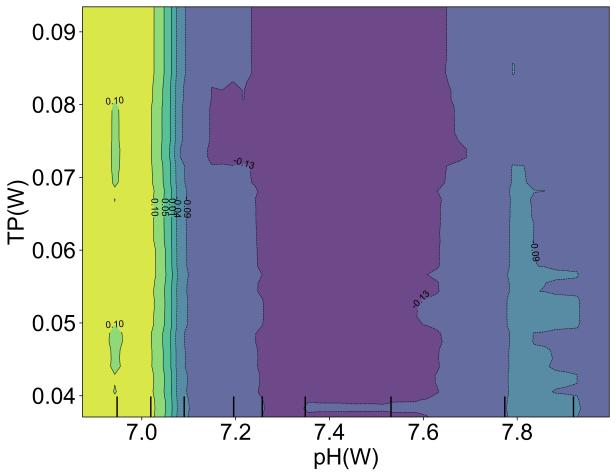

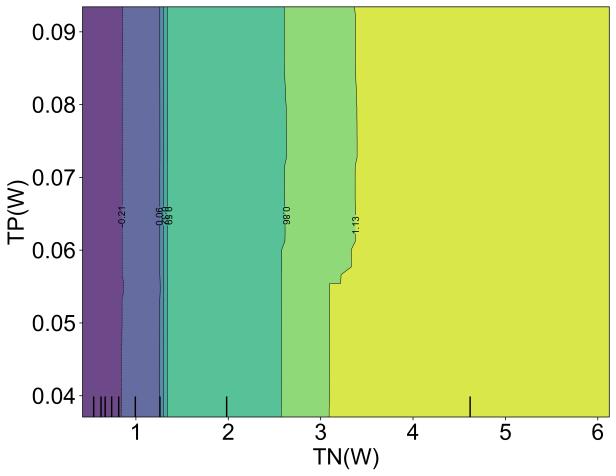

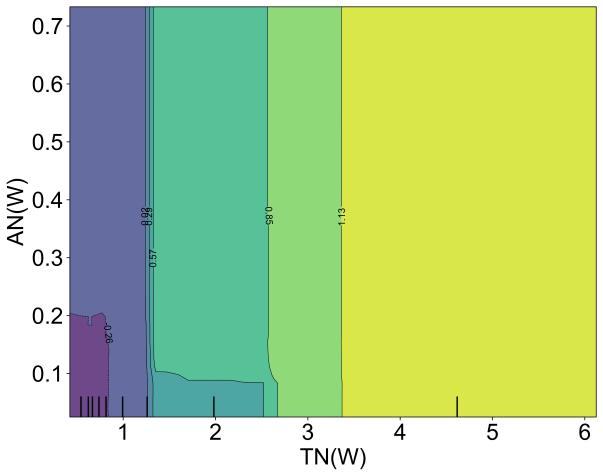

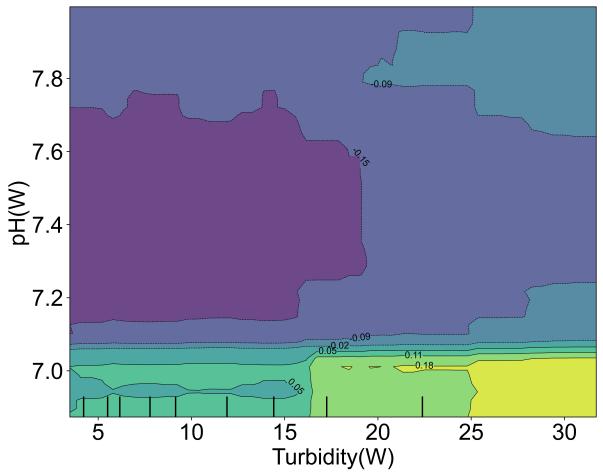

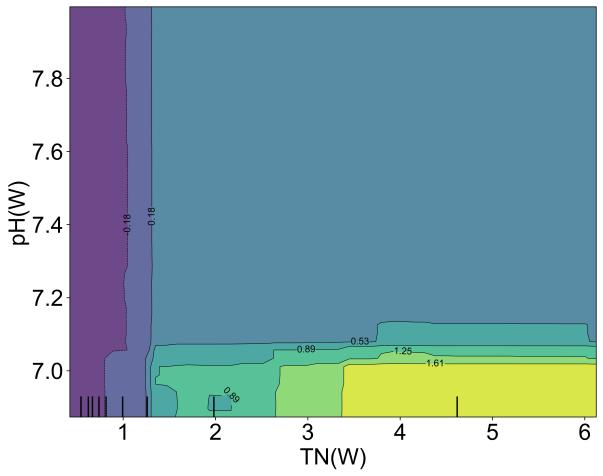

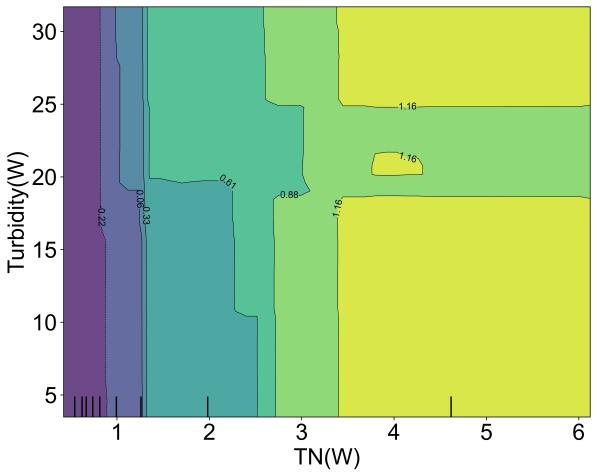


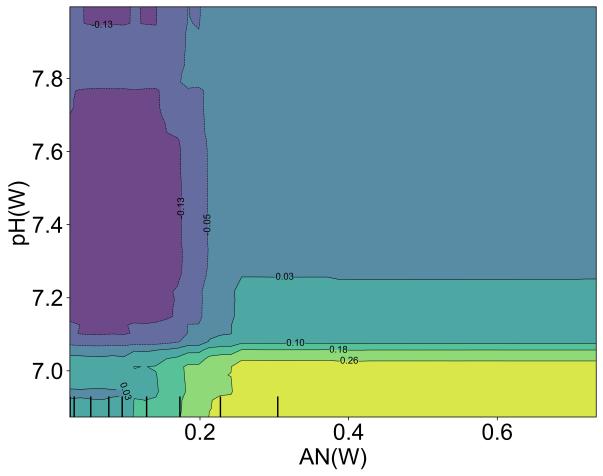

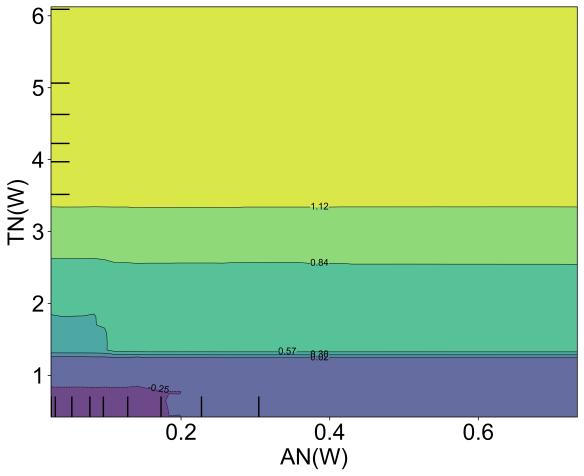


**Fig.S5** PDP charts for different combinations

**Table S1** Statistical table of data from the Wandang site of the training set

| Factor categories | Specific indicator | Unit | Average | Median | Mode | Standard deviation | Variance | Min | Max |
| --- | --- | --- | --- | --- | --- | --- | --- | --- | --- |
| Water quality factors | T(W) | ℃ | 20.58 | 21.62 | 24.26 | 6.83 | 46.61 | 6.93 | 32.46 |
| pH(W) | / | 7.35 | 7.26 | 8.00 | 0.38 | 0.15 | 6.75 | 8.47 |
| DO(W) | mg/L | 7.63 | 7.03 | 9.73 | 2.82 | 7.97 | 2.22 | 15.85 |
| EC(W) | μS/cm | 509.90 | 494.74 | 616.27 | 133.82 | 17907.28 | 218.24 | 986.12 |
| Turbidity(W) | NTU | 12.84 | 8.24 | 14.41 | 15.44 | 238.44 | 0.41 | 217.90 |
| CODMn(W) | mg/L | 5.72 | 5.64 | 6.18 | 1.47 | 2.17 | 0.25 | 10.14 |
| AN(W) | mg/L | 0.26 | 0.09 | 0.03 | 0.68 | 0.46 | 0.03 | 5.29 |
| TP(W) | mg/L | 0.06 | 0.06 | 0.06 | 0.02 | 0.00 | 0.02 | 0.18 |
| TN(W) | mg/L | 1.35 | 0.79 | 0.05 | 1.37 | 1.89 | 0.05 | 7.44 |
| Meteorological factors | Rainfall | mm | 3.41 | 0.69 | 0.00 | 6.87 | 47.23 | 0.00 | 67.93 |
| RH | % | 75.52 | 76.27 | 67.41a | 10.78 | 116.21 | 43.64 | 97.93 |
| ST | h | 3.39 | 3.12 | 1.18 | 1.91 | 3.65 | 0.20 | 7.77 |
| Hydrological factors | Runoff | mm | 0.35 | 0.11 | 0.07 | 1.78 | 3.17 | 0.03 | 31.86 |

‘a’Indicates the presence of multiple plurals. The smallest value is shown;The Runoff in the text is essentially the value of the Runoff depth, so the unit is mm, not m3/s.

**Table S2** Statistical table of data from the Siming site of the training set

| Factor categories | Specific indicator | Unit | Average | Median | Mode | Standard deviation | Variance | Min | Max |
| --- | --- | --- | --- | --- | --- | --- | --- | --- | --- |
| Water quality factors | T(S) | ℃ | 20.86 | 21.55 | 8.80 | 6.61 | 43.64 | 6.83 | 32.20 |
| pH(S) | / | 7.62 | 7.64 | 7.66a | 0.29 | 0.08 | 6.84 | 8.36 |
| DO(S) | mg/L | 8.43 | 8.18 | 11.61 | 2.17 | 4.69 | 3.99 | 14.27 |
| EC(S) | μS/cm | 446.29 | 453.68 | 475.90 | 53.47 | 2858.80 | 291.18 | 551.90 |
| Turbidity(S) | NTU | 46.75 | 35.84 | 32.80 | 46.51 | 2162.74 | 8.88 | 720.54 |
| CODMn(S) | mg/L | 5.80 | 5.58 | 4.77a | 0.95 | 0.91 | 3.85 | 8.85 |
| AN(S) | mg/L | 0.06 | 0.03 | 0.03 | 0.15 | 0.02 | 0.03 | 1.92 |
| TP(S) | mg/L | 0.05 | 0.04 | 0.03 | 0.03 | 0.00 | 0.02 | 0.17 |
| TN(S) | mg/L | 1.47 | 1.21 | 0.99 | 0.68 | 0.47 | 0.22 | 4.29 |
| Meteorological factors | Rainfall | mm | 3.41 | 0.69 | 0.00 | 6.87 | 47.23 | 0.00 | 67.93 |
| RH | % | 75.52 | 76.27 | 67.41a | 10.78 | 116.21 | 43.64 | 97.93 |
| ST | h | 3.39 | 3.12 | 1.18 | 1.91 | 3.65 | 0.20 | 7.77 |
| Hydrological factors | Runoff | mm | 0.35 | 0.11 | 0.07 | 1.78 | 3.17 | 0.03 | 31.86 |

**Table S3** 12 meteorological factor abbreviations and units

| Meteorological factors | Acronyms | Unit |
| --- | --- | --- |
| atmosphere | ATM | hPa |
| average annual temperature(2m) | AAT(2m) | ℃ |
| rainfall | Rainfall | mm |
| land surface temperature | LST | ℃ |
| relative humidity | RH | % |
| average gustiness | AGS | m/s |
| total cloud cover | TCC | % |
| total solar irradiance | TSI | J/m2 |
| sunshine time | ST | h |
| ultraviolet intensity | UVI | J/m2 |
| runoff | Runoff | mm |
| thunderstorms | TT | K |

**Table S4** Pearson results for wavelet coefficients of different factors

|  |  | Runoff | | | | | | Rainfall | | | | | |
| --- | --- | --- | --- | --- | --- | --- | --- | --- | --- | --- | --- | --- | --- |
|  |  | cA4 | cD4 | cD3 | | cD2 | cD1 | cA4 | cD4 | cD3 | cD2 | cD1 | |
| TN(S) | cA4 | 0.61** | 0.09 | 0.19 | | 0.07 | -0.04 | 0.47* | -0.12 | 0.39* | 0.19 | -0.13 | |
| cD4 | -0.39* | -0.22 | -0.19 | | -0.07 | 0.01 | -0.29 | 0.32 | -0.42* | -0.12 | 0.07 | |
| cD3 | 0.06 | -0.03 | -0.13 | | -0.11 | 0.22 | 0.13 | 0.02 | 0.05 | -.31* | 0.20 | |
| cD2 | -0.04 | -0.09 | 0.01 | | -0.05 | -0.02 | -0.03 | -0.20 | 0.15 | -0.03 | 0.04 | |
| cD1 | 0.25 | 0.19 | -0.04 | | 0.06 | -0.03 | 0.17 | 0.05 | 0.00 | -0.04 | -0.08 | |
| TP(S) | cA4 | 0.55** | -0.25 | 0.11 | | -0.08 | -0.001 | 0.79** | -0.24 | 0.22 | 0.02 | 0.05 | |
| cD4 | -0.61** | -0.20 | -0.18 | | -0.10 | 0.05 | -0.43* | 0.23 | -0.40* | -0.18 | 0.10 | |
| cD3 | -0.04 | -0.05 | 0.11 | | -0.19 | 0.13 | -0.15 | -0.06 | -0.20 | -0.23 | 0.14 | |
| cD2 | -0.04 | -0.03 | 0.00 | | -0.29** | -0.05 | 0.08 | -0.05 | 0.14 | -.48** | -0.05 | |
| cD1 | -0.19 | -0.13 | -0.01 | | 0.06 | -0.11 | -0.24 | 0.31 | -0.08 | 0.04 | -0.10 | |
| AN(S) | cA4 | 0.37* | 0.09 | 0.19 | | 0.24 | -0.15 | 0.54** | 0.01 | 0.34 | 0.28 | -0.12 | |
| cD4 | -0.56** | -0.08 | -0.14 | | -0.06 | 0.02 | -0.52** | 0.21 | -0.31 | -0.14 | -0.05 | |
| cD3 | -0.10 | -0.09 | -0.11 | | -0.11 | -0.20 | -0.18 | -0.07 | -0.20 | -0.19 | -0.18 | |
| cD2 | 0.04 | -0.01 | 0.24 | | -0.45** | -0.03 | 0.14 | -0.02 | 0.24 | -0.44** | -0.01 | |
| cD1 | 0.00 | 0.00 | 0.06 | | -0.08 | 0.16* | 0.00 | 0.00 | 0.14 | -0.05 | 0.07 | |
|  |  | RH | | | | | | ST | | | | |
|  |  | cA4 | cD4 | | cD3 | cD2 | cD1 | cA4 | cD4 | cD3 | cD2 | cD1 |
| CODMn(S) | cA4 | -0.15 | -0.29 | | 0.08 | 0.00 | 0.16 | 0.40* | 0.32 | -0.04 | -0.10 | -0.10 |
| cD4 | -0.01 | -0.16 | | -0.12 | 0.09 | 0.15 | 0.01 | 0.32 | 0.17 | 0.18 | -0.14 |
| cD3 | -0.14 | 0.11 | | -0.35* | 0.06 | -0.13 | 0.07 | -0.39* | 0.46** | -0.10 | 0.12 |
| cD2 | -0.01 | -0.25 | | -0.02 | -0.38** | 0.11 | 0.06 | 0.05 | -0.21 | 0.37** | -0.19 |
| cD1 | -0.21 | -0.01 | | 0.04 | 0.03 | 0.06 | 0.17 | 0.10 | 0.00 | -0.01 | -0.14 |

**Table S5** Different combinations of input variables and results for TN(S)

| Combined serial number | Specific indicators | Training R2 | Test  R2 |
| --- | --- | --- | --- |
| **Combine in order of relevance** | | | |
| 1 | TN(W) | 0.739 | 0.505 |
| 2 | TN(W)、AN(W) | 0.894 | 0.490 |
| 3 | TN(W)、AN(W)、Turbidity(W) | 0.944 | 0.736 |
| 4 | TN(W)、AN(W)、Turbidity(W)、CODMn(W) | 0.975 | 0.820 |
| 5 | TN(W)、AN(W)、Turbidity(W)、CODMn(W)、pH(W) | 0.986 | 0.876 |
| 6 | TN(W)、AN(W)、Turbidity(W)、CODMn(W)、pH(W)、TP(W) | 0.991 | 0.873 |
| 7 | TN(W)、AN(W)、Turbidity(W)、CODMn(W)、pH(W)、TP(W)、DO(W) | 1.000 | 0.880 |
| 8 | TN(W)、AN(W)、Turbidity(W)、CODMn(W)、pH(W)、TP(W)、DO(W)、EC(W) | 1.000 | 0.886 |
| 9 | TN(W)、AN(W)、Turbidity(W)、CODMn(W)、pH(W)、TP(W)、DO(W)、EC(W)、T(W) | 1.000 | **0.904** |
| 10 | TN(W)、AN(W)、Turbidity(W)、CODMn(W)、pH(W)、TP(W)、DO(W)、EC(W)、T(W)、Rainfall | 1.000 | 0.897 |
| 11 | TN(W)、AN(W)、Turbidity(W)、CODMn(W)、pH(W)、TP(W)、DO(W)、EC(W)、T(W)、Rainfall、runoff | 1.000 | 0.901 |
| 12 | TN(W)、AN(W)、Turbidity(W)、CODMn(W)、pH(W)、TP(W)、DO(W)、EC(W)、T(W)、Rainfall、Runoff、RH | 0.999 | 0.899 |
| 13 | TN(W)、AN(W)、Turbidity(W)、CODMn(W)、pH(W)、TP(W)、DO(W)、EC(W)、T(W)Rainfall、Runoff、RH、ST | 0.999 | 0.891 |


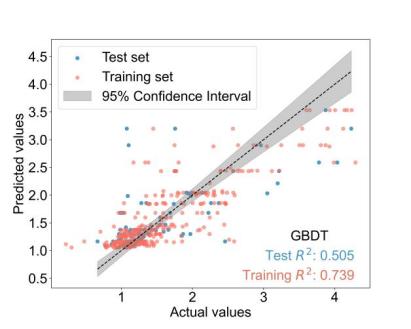

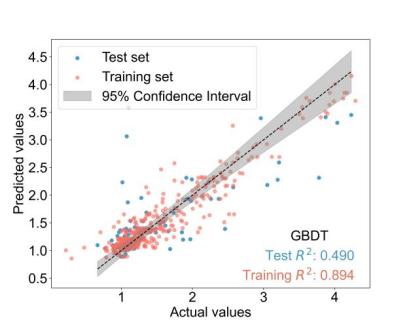

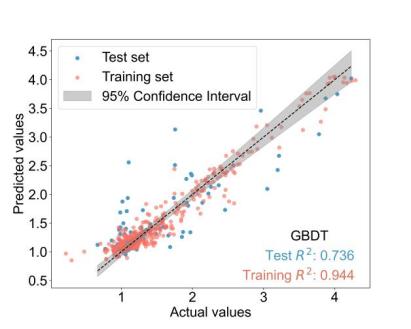

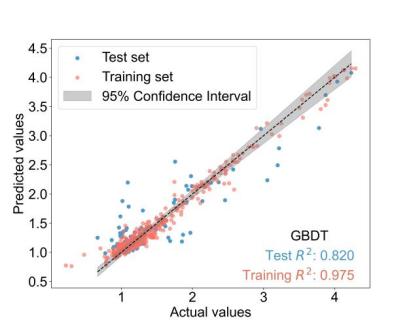

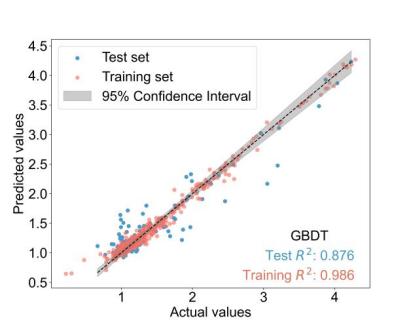

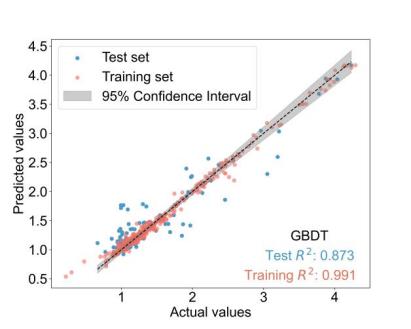


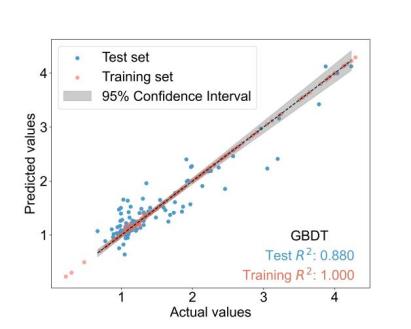

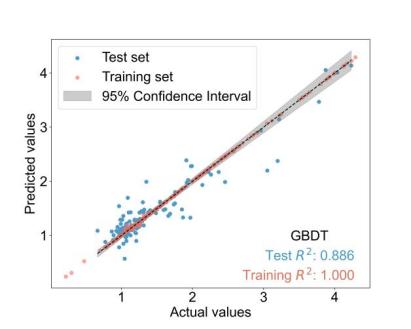

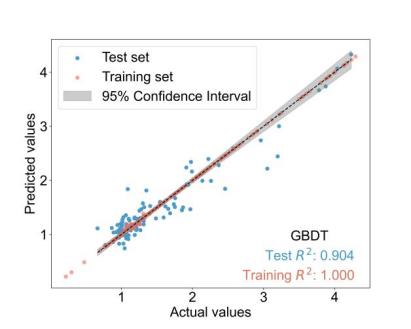

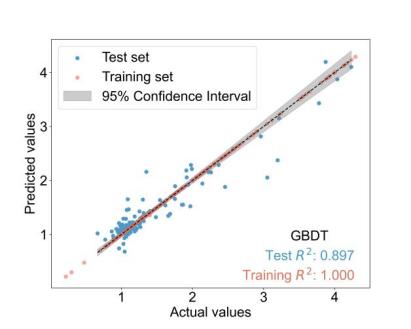

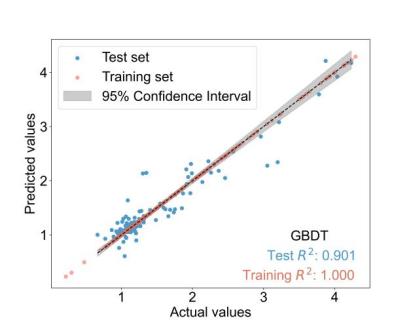

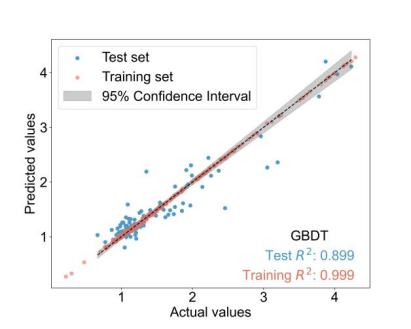

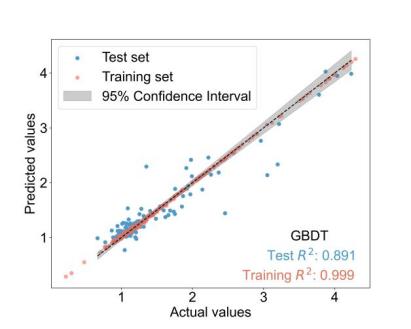


**Fig.S6** Prediction results for different combinations of input variables for TN(S)

**Table S6** Different combinations of input variables and results for CODMn(S)

| Combined serial number | Specific indicators | Training R2 | Test  R2 |
| --- | --- | --- | --- |
| 1 | CODMn(W) | 0.507 | 0.298 |
| 2 | CODMn(W)、AN(W) | 0.803 | 0.380 |
| 3 | CODMn(W)、AN(W)、T(W) | 0.870 | 0.586 |
| 4 | CODMn(W)、AN(W)、T(W)、DO(W) | 0.995 | 0.657 |
| 5 | CODMn(W)、AN(W)、T(W)、DO(W)、EC(W) | 0.994 | **0.885** |
| 6 | CODMn(W)、AN(W)、T(W)、DO(W)、EC(W)、Turbidity(W) | 0.986 | 0.658 |
| 7 | CODMn(W)、AN(W)、T(W)、DO(W)、EC(W)、Turbidity(W)、pH(W) | 0.986 | 0.720 |
| 8 | CODMn(W)、AN(W)、T(W)、DO(W)、EC(W)、Turbidity(W)、pH(W)、TN(W) | 0.997 | 0.702 |
| 9 | CODMn(W)、AN(W)、T(W)、DO(W)、EC(W)、Turbidity(W)、pH(W)、TN(W)、ST | 0.999 | 0.694 |
| 10 | CODMn(W)、AN(W)、T(W)、DO(W)、EC(W)、Turbidity(W)、pH(W)、TN(W)、ST、TP(W) | 0.999 | 0.715 |
| 11 | CODMn(W)、AN(W)、T(W)、DO(W)、EC(W)、Turbidity(W)、pH(W)、TN(W)、ST、TP(W)、rainfall | 0.996 | 0.753 |
| 12 | CODMn(W)、AN(W)、T(W)、DO(W)、EC(W)、Turbidity(W)、pH(W)、TN(W)、ST、TP(W)、rainfall、runoff | 0.996 | 0.747 |
| 13 | CODMn(W)、AN(W)、T(W)、DO(W)、EC(W)、Turbidity(W)、pH(W)、TN(W)、ST、TP(W)、rainfall、runoff、RH | 0.997 | 0.717 |


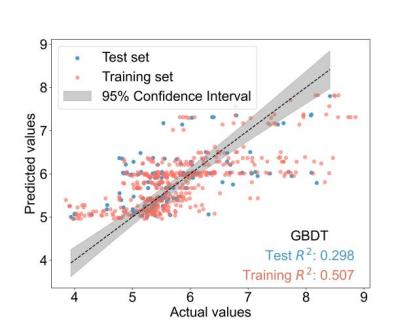

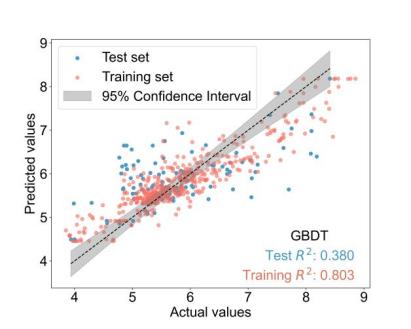

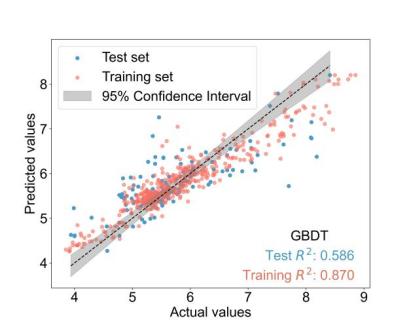

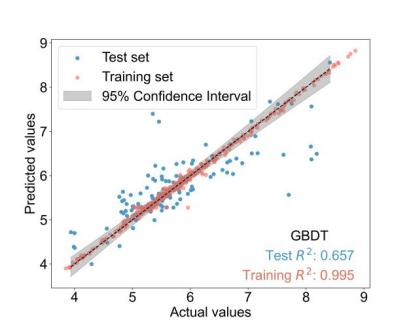

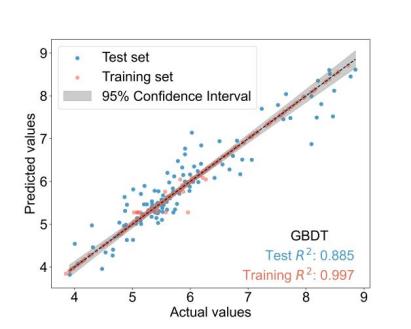

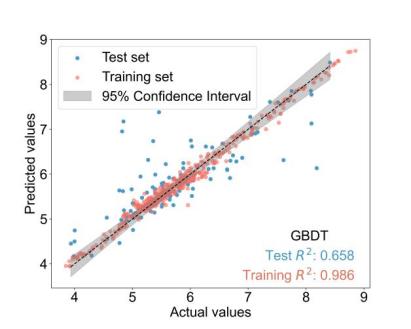

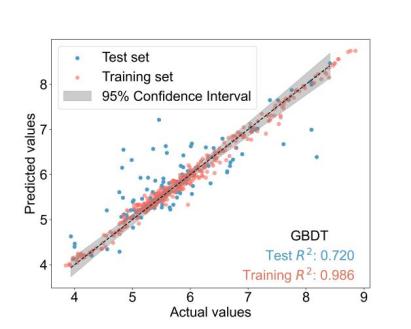

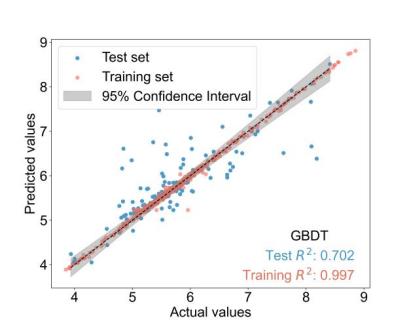

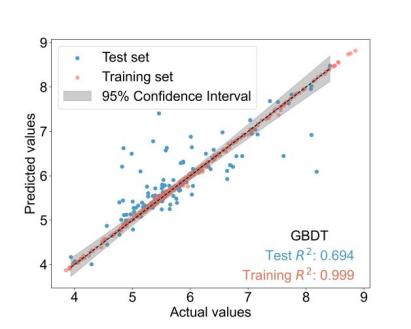

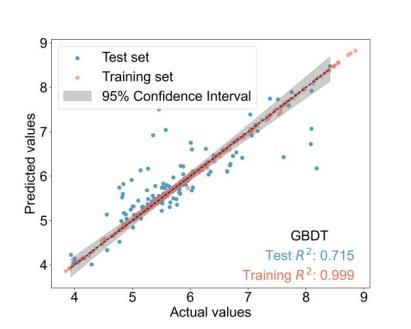

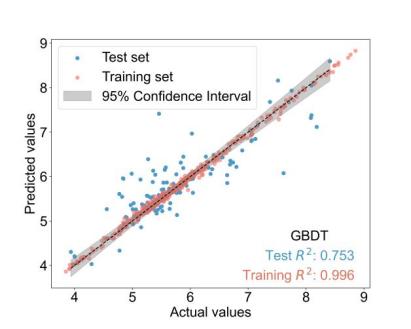

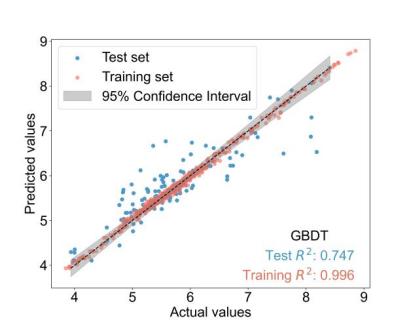

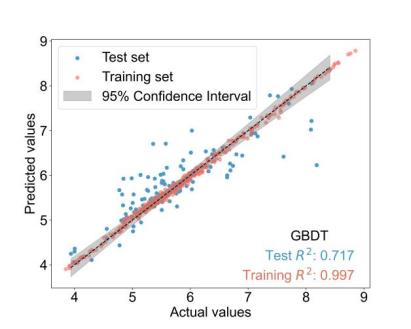


**Fig.S7** Prediction results for different combinations of input variables for CODMn(S)

**Table S7** Different combinations of input variables and results for AN(S)

| Combined serial number | Specific indicators | Training R2 | Test  R2 |
| --- | --- | --- | --- |
| 1 | AN(W) | 0.660 | 0.236 |
| 2 | AN(W)、Turbidity(W) | 0.955 | 0.858 |
| 3 | AN(W)、Turbidity(W)、TN(W) | 0.999 | 0.874 |
| 4 | AN(W)、Turbidity(W)、TN(W)、CODMn(W) | 1.000 | 0.746 |
| 5 | AN(W)、Turbidity(W)、TN(W)、CODMn(W)、TP(W) | 0.939 | 0.512 |
| 6 | AN(W)、Turbidity(W)、TN(W)、CODMn(W)、TP(W)、DO(W) | 1.000 | 0.514 |
| 7 | AN(W)、Turbidity(W)、TN(W)、CODMn(W)、TP(W)、DO(W)、pH(W) | 1.000 | 0.818 |
| 8 | AN(W)、Turbidity(W)、TN(W)、CODMn(W)、TP(W)、DO(W)、pH(W)、EC(W) | 0.999 | 0.748 |
| 9 | AN(W)、Turbidity(W)、TN(W)、CODMn(W)、TP(W)、DO(W)、pH(W)、EC(W)、Rainfall | 0.998 | **0.878** |
| 10 | AN(W)、Turbidity(W)、TN(W)、CODMn(W)、TP(W)、DO(W)、pH(W)、EC(W)、Rainfall、ST | 0.999 | 0.749 |


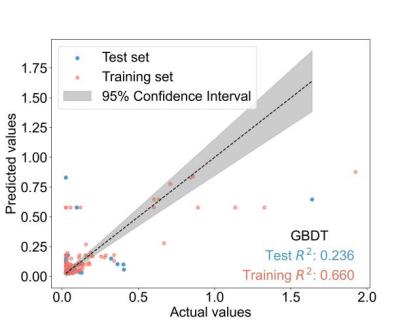

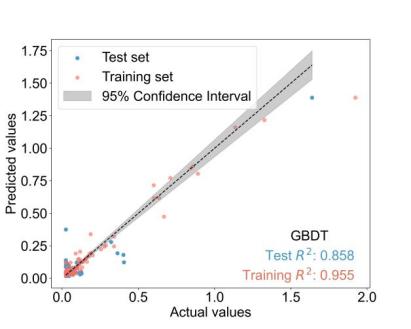

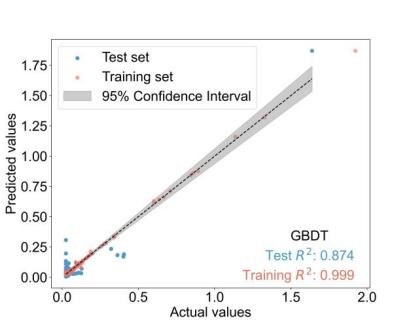

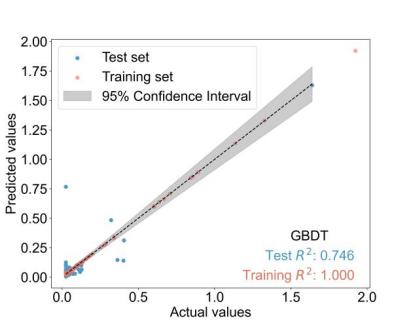

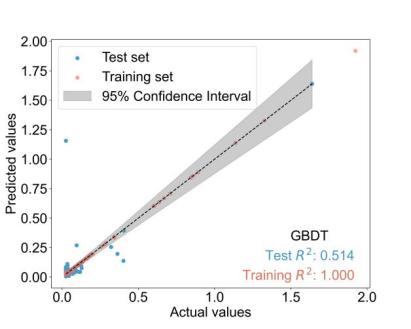

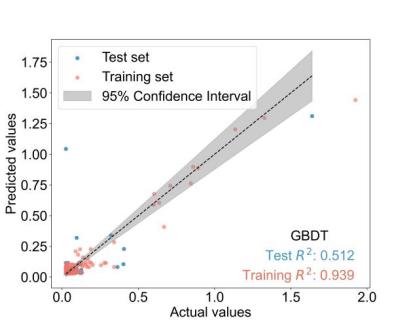

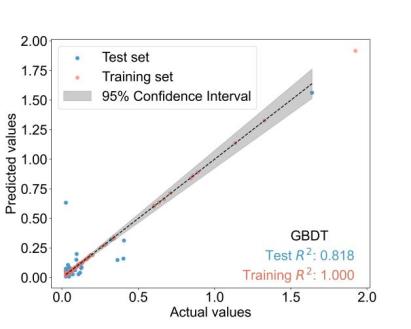

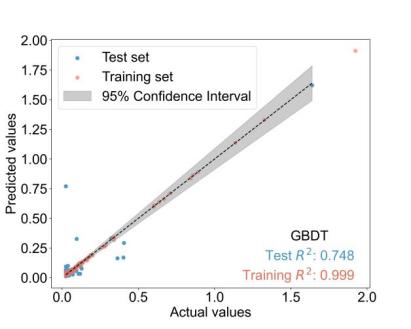

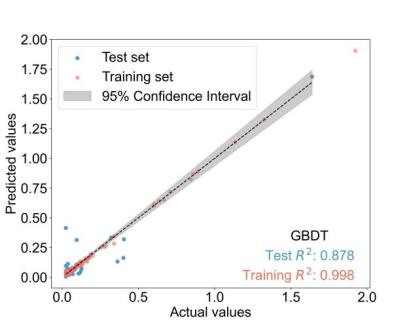

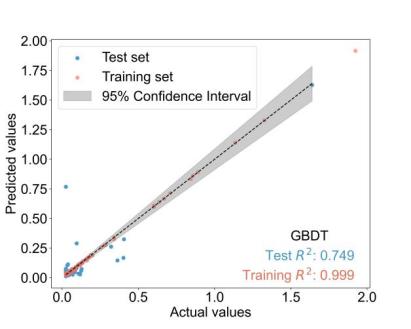


**Fig.S8** Prediction results for different combinations of input variables for AN(S)

**Table S8** Different combinations of input variables and results for TP(S)

| Combined serial number | Specific indicators | Training R2 | Test  R2 |
| --- | --- | --- | --- |
| 1 | T(W) | 0.579 | 0.347 |
| 2 | T(W)、Turbidity(W) | 0.873 | 0.747 |
| 3 | T(W)、Turbidity(W)、DO(W) | 0.947 | 0.772 |
| 4 | T(W)、Turbidity(W)、DO(W)、EC(W) | 0.999 | 0.718 |
| 5 | T(W)、Turbidity(W)、DO(W)、EC(W)、pH(W) | 0.981 | 0.756 |
| 6 | T(W)、Turbidity(W)、DO(W)、EC(W)、pH(W)、CODMn(W) | 0.990 | 0.818 |
| 7 | T(W)、Turbidity(W)、DO(W)、EC(W)、pH(W)、CODMn(W)、TP(W) | 0.997 | 0.860 |
| 8 | T(W)、Turbidity(W)、DO(W)、EC(W)、pH(W)、CODMn(W)、TP(W)、ST | 0.987 | 0.829 |
| 9 | T(W)、Turbidity(W)、DO(W)、EC(W)、pH(W)、CODMn(W)、TP(W)、ST、TN(W) | 0.999 | 0.830 |
| 10 | T(W)、Turbidity(W)、DO(W)、EC(W)、pH(W)、CODMn(W)、TP(W)、ST、TN(W)、AN(W) | 0.994 | 0.849 |
| 11 | T(W)、Turbidity(W)、DO(W)、EC(W)、pH(W)、CODMn(W)、TP(W)、ST、TN(W)、AN(W)、rainfall | 0.997 | 0.855 |
| 12 | T(W)、Turbidity(W)、DO(W)、EC(W)、pH(W)、CODMn(W)、TP(W)、ST、TN(W)、AN(W)、rainfall、RH | 0.996 | 0.856 |
| 13 | T(W)、Turbidity(W)、DO(W)、EC(W)、pH(W)、CODMn(W)、TP(W)、ST、TN(W)、AN(W)、rainfall、RH、runoff | **0.995** | **0.888** |


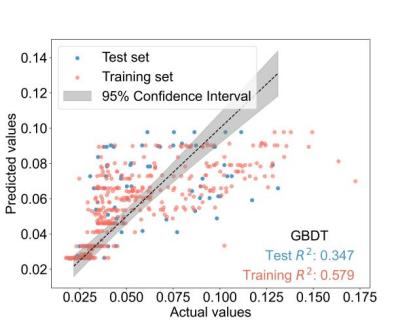

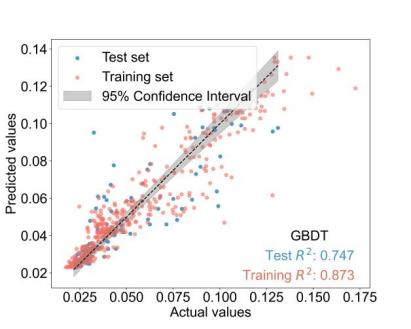

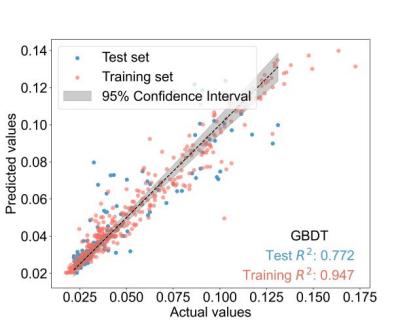

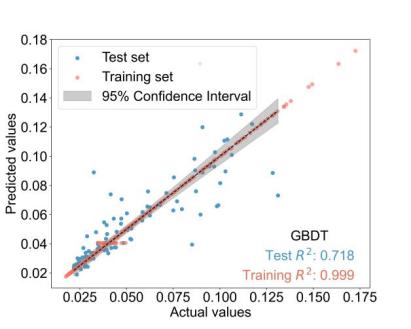

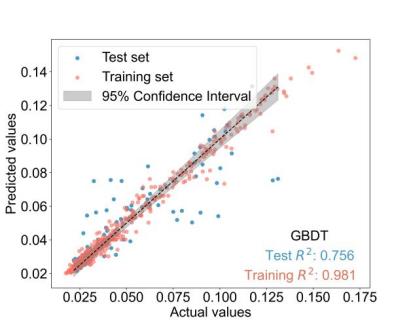

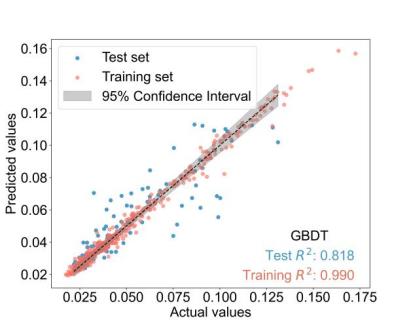

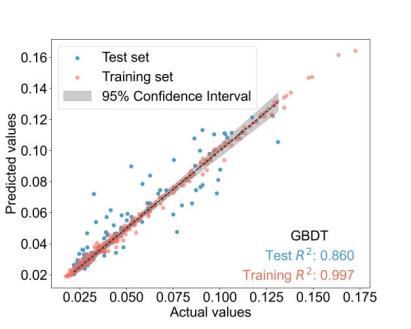

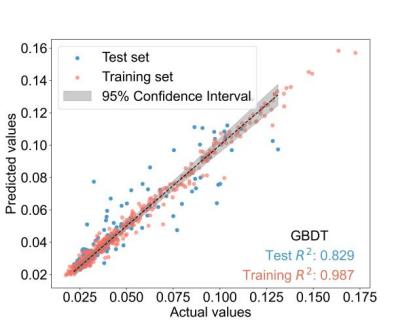

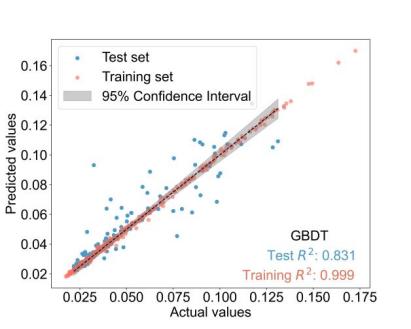

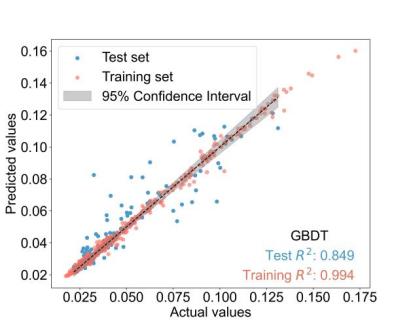

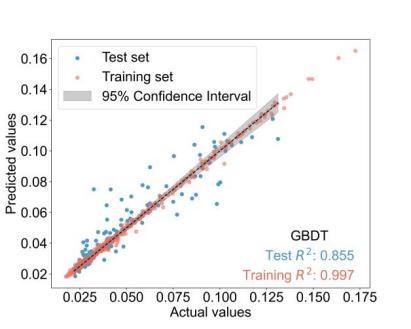

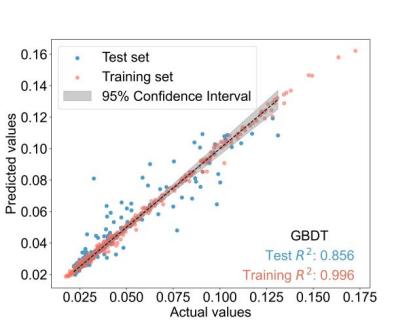

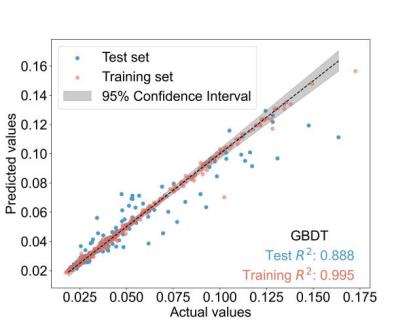


**Fig.S9** Prediction results for different combinations of input variables for TP(S)

**Table S9** Best fit results of six models for CODMn(S),AN(S), and TP(S)

|  | Models | Training R2 | Test R2 | RMSE | MAE |
| --- | --- | --- | --- | --- | --- |
| CODMn(S) | GBDT | 1.00 | 0.90 | 0.31 | 0.22 |
| RF | 0.97 | 0.88 | 0.37 | 0.28 |
| DT | 0.87 | 0.84 | 0.43 | 0.31 |
| ELM | 0.81 | 0.73 | 0.51 | 0.41 |
| SVR | 0.48 | 0.58 | 0.66 | 0.50 |
| BP | 0.36 | 0.56 | 0.67 | 0.52 |
| AN(S) | GBDT | 1.00 | 0.94 | 0.05 | 0.02 |
| RF | 0.95 | 0.91 | 0.05 | 0.02 |
| DT | 0.89 | 0.94 | 0.04 | 0.02 |
| ELM | 0.95 | 0.77 | 0.12 | 0.06 |
| SVR | 0.31 | 0.38 | 0.16 | 0.06 |
| BP | 0.33 | 0.45 | 0.15 | 0.06 |
| TP(S) | GBDT | 1.00 | 0.93 | 0.01 | 0.01 |
| RF | 0.96 | 0.92 | 0.01 | 0.01 |
| DT | 0.95 | 0.87 | 0.01 | 0.01 |
| ELM | 0.87 | 0.84 | 0.01 | 0.01 |
| SVR | 0.75 | 0.78 | 0.01 | 0.01 |
| BP | 0.09 | 0.41 | 0.02 | 0.02 |
